# Supplementary material for: A mechanically robust and stable estradiol-loaded PHEMA-based hydrogel barrier for intrauterine adhesion treatment
Source: Royal Society of Chemistry journal article supplement (doi:10.1039/d2tb01740g), 2022-01-01
Supplement: d2tb01740g1.pdf [file d2tb01740g1.pdf]

## Supplementary data

### **A mechanically robust and stable estradiol-loaded PHEMA-based hydrogel barrier for intrauterine adhesions treatment**

Xiangyan Xie<sup>‡1</sup>, Ruijuan Xu<sup>‡2</sup>, Hongyan Ouyang<sup>1</sup>, Shiqiao Tan<sup>2</sup>, Chuan Guo<sup>3</sup>, Xingqi Luo<sup>1</sup>, Yuanjie Xie<sup>1</sup>, Di Wu<sup>1</sup>, Xiangyu Dong<sup>4</sup>, Jinrong Wu<sup>4</sup>, Yi Wang<sup>1,4\*</sup> and Lijuan Zhao<sup>1\*</sup>

<sup>1</sup> College of Chemistry and Materials Science, Sichuan Normal University, Chengdu 610068, China

<sup>2</sup> Department of Obstetrics and Gynecology, West China Second University Hospital, Sichuan University, Chengdu 610041, China

<sup>3</sup> Orthopedic research institute, Department of Orthopedics, West China Hospital, Sichuan University, Chengdu, 610041, China

<sup>4</sup> State Key Laboratory of Polymer Materials Engineering, College of Polymer Science and Engineering, Sichuan University, Chengdu 610065, China

<sup>‡</sup> These authors contributed equally to this paper.

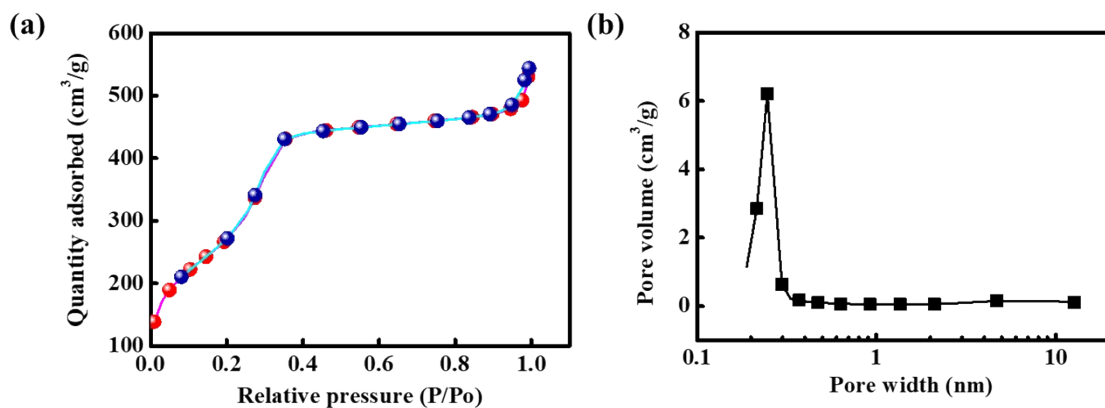

**Fig. S1.** (a) The nitrogen adsorption–desorption isotherms of E2@SiO<sub>2</sub>. (b) The pore size distribution.

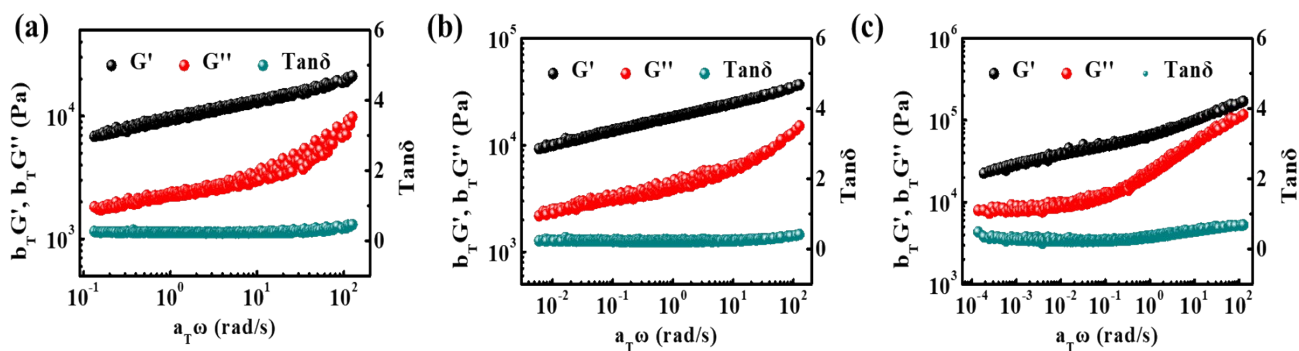

**Fig. S2.** Representative main curves of (a) the PHM hydrogel, (b) PHM<sub>C</sub> hydrogel, and (c) PHM<sub>H</sub>-Si hydrogel obtained by changing the frequency sweep curve at different temperatures with a reference temperature of 10 °C.

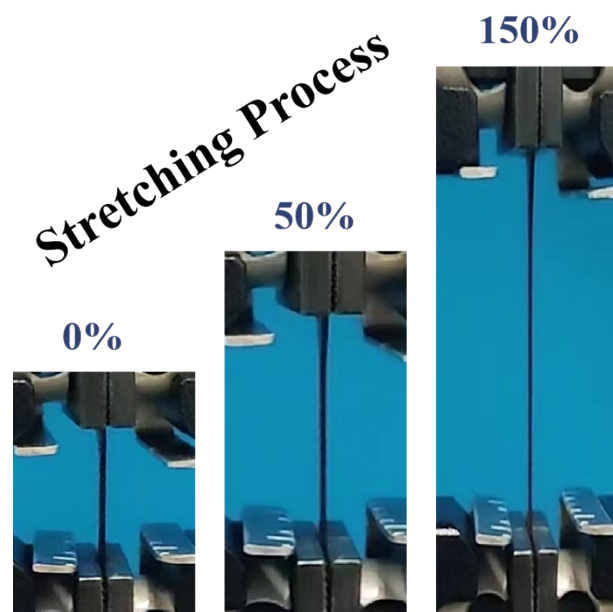

**Fig. S3.** Stretching of the PHM<sub>H</sub>-Si hydrogel.

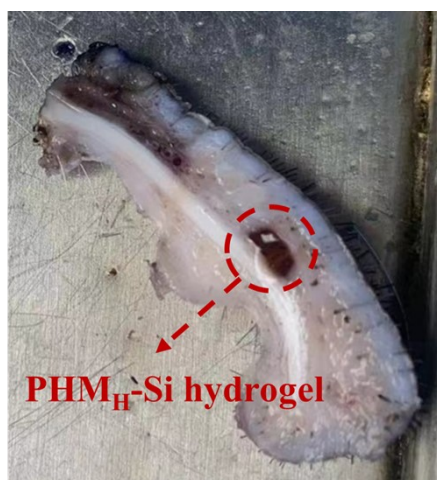

**Fig. S4.** Photograph of the PHM<sub>H</sub>-Si hydrogel implanted under pig skin for 2 months.

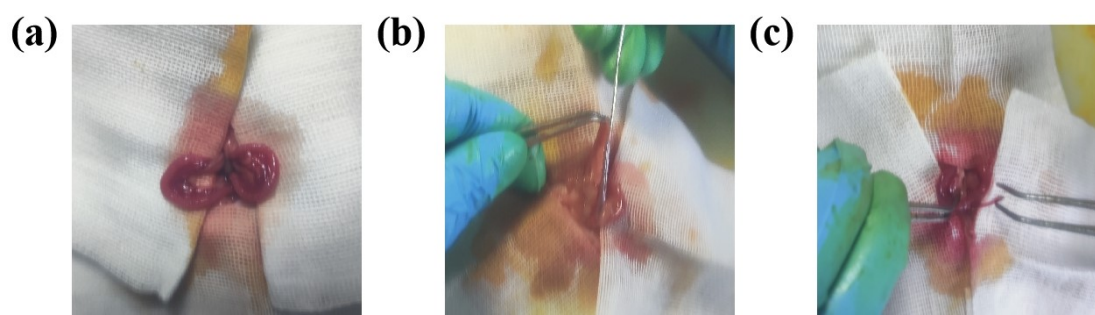

**Fig. S5.** The surgery process of IUAs rat model and treatment with PHM<sub>H</sub>-Si hydrogel. **(a)** Exposing the uterus of the rat. **(b)** Establishing IUAs rat model by mechanical injury. **(c)** Putting PHM<sub>H</sub>-Si hydrogel into the injured uterus.
